# Supplementary material for: Coexistence of ferromagnetism and enhanced photo-response in Fe-doped SnSe 2 single crystals
Source: Royal Society of Chemistry journal article supplement (doi:10.1039/d5cp03461b), 2025-12-08
Supplement: d5cp03461b1.pdf [file d5cp03461b1.pdf]

# Coexistence of Ferromagnetism and Enhanced Photo-response in Fe-Doped SnSe<sub>2</sub> Single Crystals

Aarti Lakhara,<sup>1</sup> and P. A. Bhobe<sup>1,\*</sup>

<sup>1</sup>Department of Physics, Indian Institute of Technology Indore, Khandwa Road, Indore, Simrol, 453552, India

\*Correspondence email: [pbhobe@iiti.ac.in](mailto:pbhobe@iiti.ac.in)

## Supplementary Information

**S1. Energy dispersive X-ray spectroscopy (EDS) result of Fe-doped SnSe<sub>2</sub>:** For each synthesized crystal EDS measurement is performed on two to three different spot to confirm homogenous distribution of Fe in the crystal.

(a) Elemental-mapping of Sn, Se, Fe and EDS spectra of 1 % Fe-doped SnSe<sub>2</sub>.

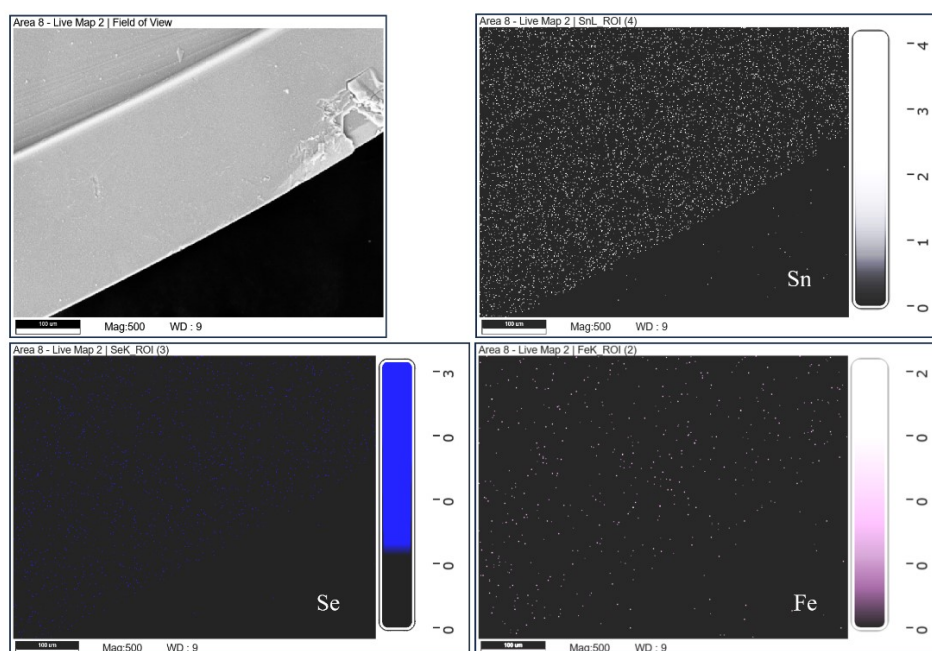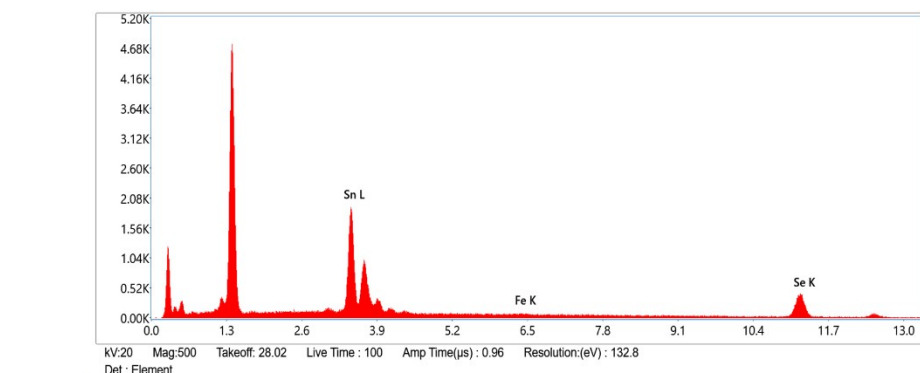

| eZAF Quant Result - Analysis Uncertainty: 7.23 % |          |      |          |         |          |        |        |        |
|--------------------------------------------------|----------|------|----------|---------|----------|--------|--------|--------|
| Element                                          | Weight % | MDL  | Atomic % | Error % | Net Int. | R      | A      | F      |
| Fe K                                             | 0.5      | 0.65 | 0.8      | 57.8    | 3.5      | 0.8419 | 0.8713 | 1.0978 |
| Se K                                             | 59.2     | 2.39 | 68.3     | 5.6     | 76.0     | 0.9206 | 0.9749 | 1.1210 |
| Sn L                                             | 40.3     | 0.74 | 30.9     | 5.8     | 199.6    | 0.8045 | 0.7252 | 1.0065 |

(b)

Elemental-

mapping of Sn, Se, Fe and EDS spectra of 3% Fe-doped SnSe<sub>2</sub>.

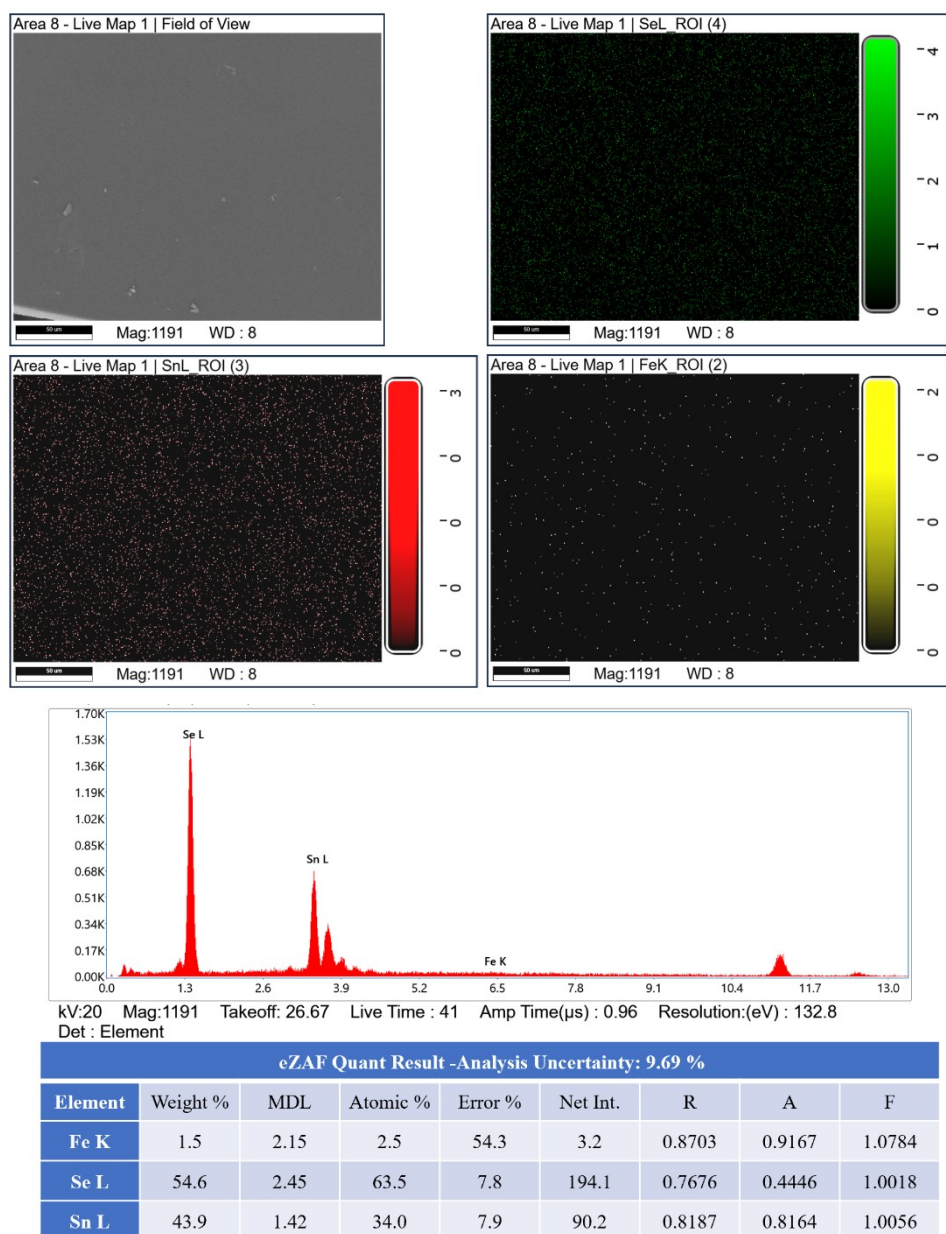

Fig. S1. The EDS mapping and spectra (a) for 1% Fe-doped and (b) for 3% Fe-doped SnSe<sub>2</sub> single crystals.

**S2. Absorbance spectra of SnSe<sub>2</sub> and doped systems:** The absorbance spectra were recorded for polycrystalline samples of SnSe<sub>2</sub> and Fe-doped SnSe<sub>2</sub>. Due to the limited availability and flake-like morphology of the single crystals, absorbance measurements could not be performed on single-crystal specimens. It is evident that with Fe-doping band gap decreases.

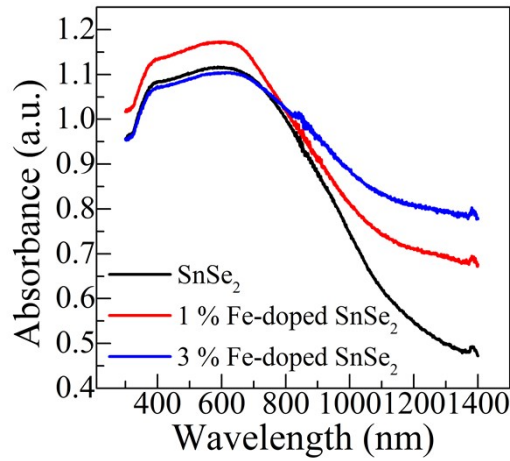

**Fig. S2.** Absorbance spectra of undoped and Fe-doped  $\text{SnSe}_2$  polycrystalline samples.

**S3. Tauc plots for indirect transitions:** The diffuse reflectance spectrum of  $\text{SnSe}_2$  and Fe-doped  $\text{SnSe}_2$  is measured by diffuse reflectance spectroscopy. The raw spectra were transformed to absorption spectrum  $(Fh\nu)^{1/2}$  by applying the kubelka-munk function. The calculated band gap decreases with Fe-doping hence it is confirmed that Fe-doping increases the valence band maxima and decreases the conduction band minimum.

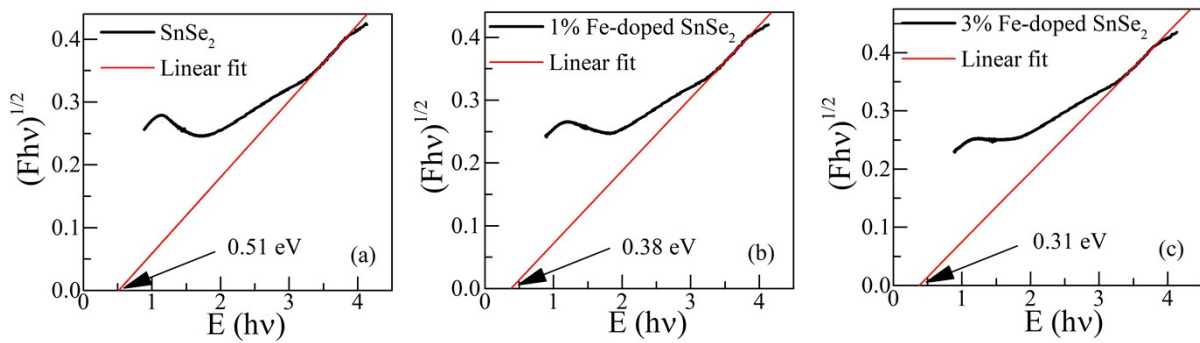

**Fig. S3.** Tauc plot of undoped and doped  $\text{SnSe}_2$  samples. The linear part of the plot is extrapolated to the x-axis. The value of the absorption spectrum  $(Fh\nu)^{1/2}$  was transformed from the raw diffuse reflectance spectrum by applying the kubelka-munk function.
